# Supplementary material for: Transition-metal-bridged bimetallic clusters with multiple uranium–metal bonds
Source: Springer Nature journal article supplement (doi:10.1038/s41557-018-0195-4), 2019-01-28
Supplement: 41557_2018_195_MOESM31_ESM.mol [file 41557_2018_195_MOESM31_ESM.mol]

nchem.18051016B-comp5U2Ni3.mol
  ChemDraw10101810552D

 67 72  0  0  0  0  0  0  0  0999 V2000
   -3.5223   -0.0338    0.0000 N   0  0  0  0  0  0  0  0  0  0  0  0
   -2.0276   -0.0422    0.0000 U   0  0  0  0  0  0  0  0  0  0  0  0
   -4.4057    0.7884    0.0000 C   0  0  0  0  0  0  0  0  0  0  0  0
   -3.5445   -1.5296    0.0000 C   0  0  0  0  0  0  0  0  0  0  0  0
   -3.1142   -1.8289    0.0000 C   0  0  0  0  0  0  0  0  0  0  0  0
   -2.0106   -1.0245    0.0000 N   0  0  0  0  0  0  0  0  0  0  0  0
   -3.9555    1.3371    0.0000 C   0  0  0  0  0  0  0  0  0  0  0  0
   -3.1375    1.1196    0.0000 N   0  0  0  0  0  0  0  0  0  0  0  0
   -4.3863   -0.6878    0.0000 C   0  0  0  0  0  0  0  0  0  0  0  0
   -4.0495   -1.2926    0.0000 C   0  0  0  0  0  0  0  0  0  0  0  0
   -3.0020   -1.0058    0.0000 N   0  0  0  0  0  0  0  0  0  0  0  0
   -0.0570   -0.1948    0.0000 Ni  0  0  0  0  0  0  0  0  0  0  0  0
    3.4931   -0.2197    0.0000 N   0  0  0  0  0  0  0  0  0  0  0  0
    1.9423   -0.2114    0.0000 U   0  0  0  0  0  0  0  0  0  0  0  0
    4.2374   -1.0245    0.0000 C   0  0  0  0  0  0  0  0  0  0  0  0
    3.6575    1.4198    0.0000 C   0  0  0  0  0  0  0  0  0  0  0  0
    2.8905    1.6817    0.0000 C   0  0  0  0  0  0  0  0  0  0  0  0
    1.6344    0.7638    0.0000 N   0  0  0  0  0  0  0  0  0  0  0  0
    3.7472   -1.6843    0.0000 C   0  0  0  0  0  0  0  0  0  0  0  0
    2.6473   -1.4735    0.0000 N   0  0  0  0  0  0  0  0  0  0  0  0
    4.4057    0.4096    0.0000 C   0  0  0  0  0  0  0  0  0  0  0  0
    4.0503    1.0456    0.0000 C   0  0  0  0  0  0  0  0  0  0  0  0
    2.8344    0.8274    0.0000 N   0  0  0  0  0  0  0  0  0  0  0  0
   -0.5411    0.8292    0.0000 Ni  0  0  0  0  0  0  0  0  0  0  0  0
    0.4531   -1.3376    0.0000 Ni  0  0  0  0  0  0  0  0  0  0  0  0
   -1.9357    1.9584    0.0000 P   0  0  0  0  0  0  0  0  0  0  0  0
   -1.1885    1.6087    0.0000 C   0  0  0  0  0  0  0  0  0  0  0  0
   -0.5120    2.0809    0.0000 C   0  0  0  0  0  0  0  0  0  0  0  0
   -1.1178    0.7867    0.0000 C   0  0  0  0  0  0  0  0  0  0  0  0
   -2.0064    2.7804    0.0000 C   0  0  0  0  0  0  0  0  0  0  0  0
   -2.7536    3.1301    0.0000 C   0  0  0  0  0  0  0  0  0  0  0  0
   -1.3300    3.2526    0.0000 C   0  0  0  0  0  0  0  0  0  0  0  0
   -0.7946   -2.3675    0.0000 P   0  0  0  0  0  0  0  0  0  0  0  0
   -1.0474   -3.1529    0.0000 C   0  0  0  0  0  0  0  0  0  0  0  0
   -0.4937   -3.7644    0.0000 C   0  0  0  0  0  0  0  0  0  0  0  0
   -1.8539   -3.3266    0.0000 C   0  0  0  0  0  0  0  0  0  0  0  0
    0.0119   -2.1938    0.0000 C   0  0  0  0  0  0  0  0  0  0  0  0
    0.2647   -1.4085    0.0000 C   0  0  0  0  0  0  0  0  0  0  0  0
    0.5656   -2.8054    0.0000 C   0  0  0  0  0  0  0  0  0  0  0  0
   -2.0106   -2.4050    0.0000 P   0  0  0  0  0  0  0  0  0  0  0  0
   -2.3550   -3.1546    0.0000 C   0  0  0  0  0  0  0  0  0  0  0  0
   -1.8780   -3.8277    0.0000 C   0  0  0  0  0  0  0  0  0  0  0  0
   -3.1765   -3.2311    0.0000 C   0  0  0  0  0  0  0  0  0  0  0  0
   -1.1891   -2.3284    0.0000 C   0  0  0  0  0  0  0  0  0  0  0  0
   -0.8447   -1.5788    0.0000 C   0  0  0  0  0  0  0  0  0  0  0  0
   -0.7121   -3.0016    0.0000 C   0  0  0  0  0  0  0  0  0  0  0  0
    1.5938   -2.3051    0.0000 P   0  0  0  0  0  0  0  0  0  0  0  0
    0.8274   -1.9999    0.0000 C   0  0  0  0  0  0  0  0  0  0  0  0
    0.1798   -2.5111    0.0000 C   0  0  0  0  0  0  0  0  0  0  0  0
    0.7085   -1.1835    0.0000 C   0  0  0  0  0  0  0  0  0  0  0  0
    1.7128   -3.1215    0.0000 C   0  0  0  0  0  0  0  0  0  0  0  0
    2.4792   -3.4267    0.0000 C   0  0  0  0  0  0  0  0  0  0  0  0
    1.0652   -3.6327    0.0000 C   0  0  0  0  0  0  0  0  0  0  0  0
    0.7767    2.2016    0.0000 P   0  0  0  0  0  0  0  0  0  0  0  0
    1.1789    2.9219    0.0000 C   0  0  0  0  0  0  0  0  0  0  0  0
    0.7563    3.6304    0.0000 C   0  0  0  0  0  0  0  0  0  0  0  0
    2.0039    2.9337    0.0000 C   0  0  0  0  0  0  0  0  0  0  0  0
   -0.0482    2.1898    0.0000 C   0  0  0  0  0  0  0  0  0  0  0  0
   -0.4505    1.4695    0.0000 C   0  0  0  0  0  0  0  0  0  0  0  0
   -0.4709    2.8983    0.0000 C   0  0  0  0  0  0  0  0  0  0  0  0
    1.6746    2.4074    0.0000 P   0  0  0  0  0  0  0  0  0  0  0  0
    2.0065    3.1627    0.0000 C   0  0  0  0  0  0  0  0  0  0  0  0
    1.5183    3.8277    0.0000 C   0  0  0  0  0  0  0  0  0  0  0  0
    2.8265    3.2529    0.0000 C   0  0  0  0  0  0  0  0  0  0  0  0
    0.8546    2.3171    0.0000 C   0  0  0  0  0  0  0  0  0  0  0  0
    0.5227    1.5618    0.0000 C   0  0  0  0  0  0  0  0  0  0  0  0
    0.3664    2.9822    0.0000 C   0  0  0  0  0  0  0  0  0  0  0  0
 30 31  1  0      
 30 32  1  0      
 27 28  1  0      
 27 29  1  0      
 26 27  1  0      
 26 30  1  0      
  8 26  1  0      
 37 38  1  0      
 37 39  1  0      
 34 35  1  0      
 34 36  1  0      
 33 34  1  0      
 33 37  1  0      
  6 33  1  0      
 44 45  1  0      
 44 46  1  0      
 41 42  1  0      
 41 43  1  0      
 40 41  1  0      
 40 44  1  0      
 11 40  1  0      
 51 52  1  0      
 51 53  1  0      
 48 49  1  0      
 48 50  1  0      
 47 48  1  0      
 47 51  1  0      
 20 47  1  0      
 58 59  1  0      
 58 60  1  0      
 55 56  1  0      
 55 57  1  0      
 54 55  1  0      
 54 58  1  0      
 18 54  1  0      
 65 66  1  0      
 65 67  1  0      
 62 63  1  0      
 62 64  1  0      
 61 62  1  0      
 61 65  1  0      
 23 61  1  0      
  1  9  1  0      
  1  3  1  0      
  3  7  1  0      
  1  4  1  0      
  4  5  1  0      
  5  6  1  0      
  7  8  1  0      
  9 10  1  0      
 10 11  1  0      
  2  6  1  0      
  8  2  1  0      
  2 11  1  0      
  2 12  1  0      
 13 21  1  0      
 13 15  1  0      
 15 19  1  0      
 13 16  1  0      
 16 17  1  0      
 17 18  1  0      
 19 20  1  0      
 21 22  1  0      
 22 23  1  0      
 14 18  1  0      
 20 14  1  0      
 14 23  1  0      
 24  2  1  0      
 24 14  1  0      
 25 14  1  0      
 25  2  1  0      
 12 14  1  0      
M  STY  1   1 SUP
M  SLB  1   1   1
M  SAL   1  7  26  27  28  29  30  31  32
M  SBL   1  1   7
M  SMT   1 P\Si\nPr2
M  SBV   1   7   -1.2017   -0.8389
M  STY  1   2 SUP
M  SLB  1   2   2
M  SAL   2  7  33  34  35  36  37  38  39
M  SBL   2  1  14
M  SMT   2 P\Si\nPr2
M  SBV   2  14   -1.2159    1.3430
M  STY  1   3 SUP
M  SLB  1   3   3
M  SAL   3  7  40  41  42  43  44  45  46
M  SBL   3  1  21
M  SMT   3 P\Si\nPr2
M  SBV   3  21   -0.9914    1.3991
M  STY  1   4 SUP
M  SLB  1   4   4
M  SAL   4  7  47  48  49  50  51  52  53
M  SBL   4  1  28
M  SMT   4 P\Si\nPr2
M  SBV   4  28    1.0535    0.8316
M  STY  1   5 SUP
M  SLB  1   5   5
M  SAL   5  7  54  55  56  57  58  59  60
M  SBL   5  1  35
M  SMT   5 P\Si\nPr2
M  SBV   5  35    0.8577   -1.4378
M  STY  1   6 SUP
M  SLB  1   6   6
M  SAL   6  7  61  62  63  64  65  66  67
M  SBL   6  1  42
M  SMT   6 P\Si\nPr2
M  SBV   6  42    1.1598   -1.5800
M  END
